# Supplementary material for: Sea-ice-related halogen enrichment at Law Dome, coastal East Antarctica
Source: Copernicus journal article supplement (doi:10.5194/cp-13-171-2017), 2017-02-27
Supplement: Supplementary file 1 [file cp-13-171-2017-supplement.pdf]

Supplement of Clim. Past, 13, 171–184, 2017  
<http://www.clim-past.net/13/171/2017/>  
doi:10.5194/cp-13-171-2017-supplement  
© Author(s) 2017. CC Attribution 3.0 License.

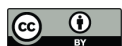

## *Supplement of*

# **Sea-ice-related halogen enrichment at Law Dome, coastal East Antarctica**

**Paul Vallelonga et al.**

*Correspondence to:* Paul Vallelonga (vallelonga@nbi.ku.dk)

The copyright of individual parts of the supplement might differ from the CC-BY 3.0 licence.

# Revised Supplementary Figures

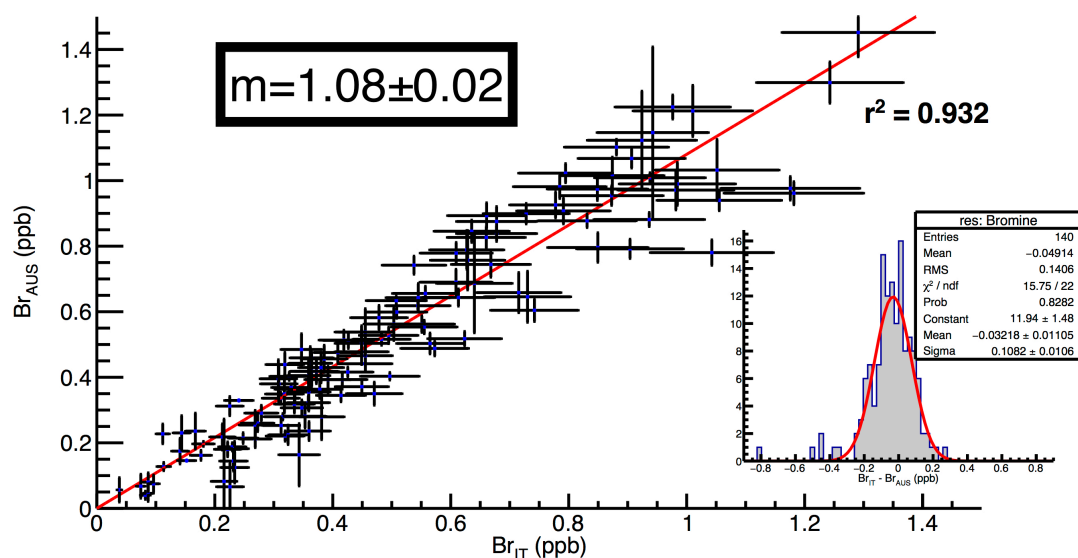

Supplementary Figure S1. Compatibility of bromine measurements between ICP-SFMS facilities in Italy (x-axis) and Australia (y-axis). The reproducibility of measurements between the two laboratories was tested by analyzing 140 Greenland snow pit samples in both laboratories. The gradient ( $m$ ) and correlation coefficient ( $r^2$ ) are shown in the figure.

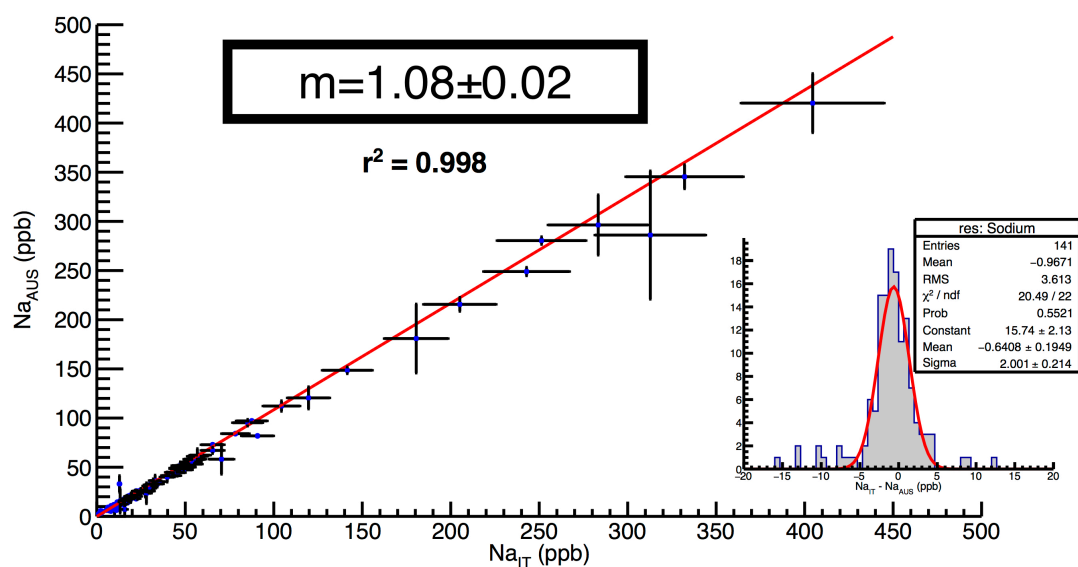

Supplementary Figure S2. Compatibility of sodium measurements between ICP-SFMS facilities in Italy (x-axis) and Australia (y-axis). The reproducibility of measurements between the two laboratories was tested by analyzing 140 Greenland snow pit samples in both laboratories. The gradient ( $m$ ) and correlation coefficient ( $r^2$ ) are shown in the figure.

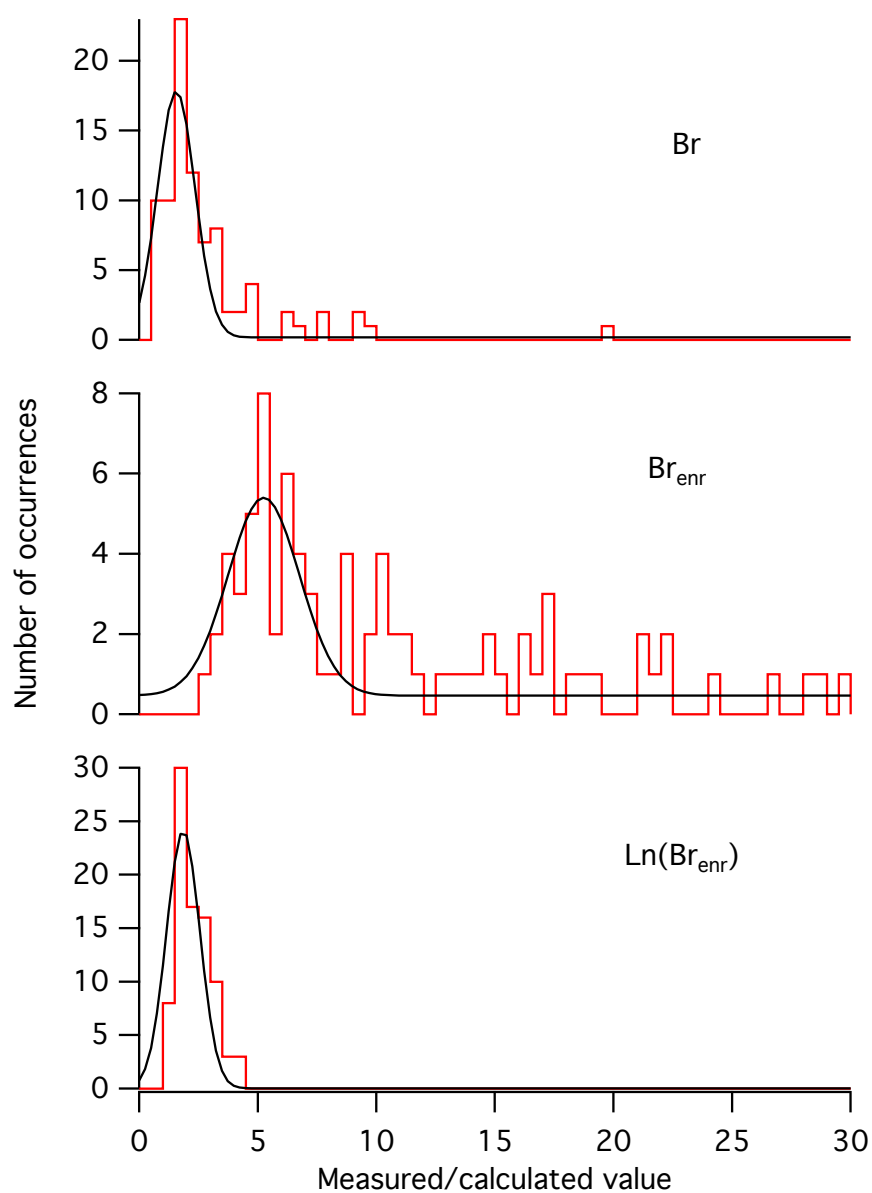

Supplementary Figure S3. Distributions of Br concentration, Br<sub>enr</sub> and ln(Br<sub>enr</sub>) and fitted gaussian distributions. Although statistics are not shown, it can be observed that of the three dataserie's, ln(Br<sub>enr</sub>) is best approximated by a gaussian distribution.
